# Supplementary material for: Endoscopic surveillance for bladder cancer: a systematic review of contemporary worldwide practices
Source: PubMed Central journal article supplement — Transl Androl Urol. 2021 Jun;10(6):2750–61. doi: 10.21037/tau-20-1363 (PMC8261410; doi:10.21037/tau-20-1363), 2021-06
Supplement: tau-10-06-2750-supplementary.pdf [file tau-10-06-2750-supplementary.pdf]

## Systematic Review Plan

### 1) Formulate review question

#### PICOS Question formulation

Population – Urothelial (TCC) bladder cancer patients (both NMIBC and MIBC)

Intervention/Exposure – Endoscopic surveillance / follow-up schedule

Comparison – Different follow-up regimes

Outcomes – To include (but not exclusively): number of recurrences, frequency of cystoscopies, time to recurrence or recurrence free survival

Study designs – RCTs and observational studies, written in English only

*In patients with pure urothelial bladder cancer, is there a consensus on the follow-up/surveillance regimen recommended for NMIBC and MIBC patients who have undergone bladder sparing treatments?*

### 2) Define inclusion and exclusion criteria

#### Search criteria

((Surveillance OR follow-up OR follow-up regimens OR follow up OR follow up regimens) AND (Endoscope OR endoscopy OR endoscopic OR cystoscopy OR cystoscope)) AND ((exp bladder cancer/) OR (Non-muscle invasive bladder cancer OR NMIBC) OR ((Muscle invasive bladder cancer OR MIBC) AND (Radiotherapy OR radiation)))

#### Inclusion criteria

Must be about NMIBC or MIBC (who have undergone chemo/radiotherapy only)

Must be about endoscopic follow up

#### Exclusion criteria

No upper tract urothelial carcinoma

#### Databases to search:

1. Medline (PubMed)
2. Ovid Gateway (Embase and Ovid)
